# Supplementary material for: Real-world clinical effectiveness and safety of vedolizumab and anti-tumor necrosis factor alpha treatment in ulcerative colitis and Crohn’s disease patients: a German retrospective chart review
Source: Springer Nature journal article supplement (doi:10.1186/s12876-020-01332-w), 2020-07-08
Supplement: MOESM1 [file 18159400]

## Additional File 1

### Study sites and affiliated ethics committee study approvals

| Site Number | Site Type                              | Site Name and Address                                                                    | Ethics Committee Name and Address                                                                                                                                       | Ethics Committee Reference Number                                                                                                                                                                                                            |
|-------------|----------------------------------------|------------------------------------------------------------------------------------------|-------------------------------------------------------------------------------------------------------------------------------------------------------------------------|----------------------------------------------------------------------------------------------------------------------------------------------------------------------------------------------------------------------------------------------|
| 1           | Office-Based Clinic (Private Practice) | Practice Dr. Mross<br>Ehrenfelsstrasse 47<br>10318 Berlin                                | LaGeSo<br>Office of Ethics Committee of state Berlin<br>Fehrbelliner Platz 1<br>10707 Berlin                                                                            | No submission required (according to § 15 of professional code of conduct "Berufsordnung" of physician chamber Berlin, no submission of a non-interventional study to local EC is required, if a positive vote from another EC is available) |
| 2           | Office-Based Clinic (Private Practice) | Gastroenterology joint practice Herne<br>Wiescherstr. 20<br>44623 Herne                  | Ethics Committee of physician chamber Westfalen-Lippe and of Medical department of Westfaelische Wilhelms-University Muenster<br>Gartenstr. 210 - 214<br>48147 Muenster | 2016-124-f-S (approved on May 12, 2016)                                                                                                                                                                                                      |
| 3           | Office-Based Clinic (Private Practice) | Practice for Gastroenterology<br>Burgstrasse 61<br>69121 Heidelberg                      | Ethics Committee at state physician chamber Baden-Wuerttemberg<br>Jahnstraße 40<br>70597 Stuttgart                                                                      | F-2016-024 (approved on April 26, 2016)                                                                                                                                                                                                      |
| 4           | Office-Based Clinic (Private Practice) | Gastroenterology at Bayerischer Platz<br>Innsbrucker Str. 58<br>10825 Berlin             | LaGeSo<br>Office of Ethics Committee of State Berlin Berlin<br>Fehrbelliner Platz 1<br>10707 Berlin                                                                     | No submission required (according to § 15 of professional code of conduct "Berufsordnung" of physician chamber Berlin, no submission of a non-interventional study to local EC is required, if a positive vote from another EC is available) |
| 5           | Office-Based Clinic (Private Practice) | Gastroenterology Opernstrasse<br>Opernstrasse 9<br>34117 Kassel                          | Ethics Committee of State Physician Chamber Hessen<br>Im Vogelsgesang 3<br>60488 Frankfurt                                                                              | III/1/ewa MC 106/2016 (approved on June 09, 2016)                                                                                                                                                                                            |
| 6           | Office-Based Clinic (Private Practice) | Internistic joint practice Oldenburg<br>Neue Donnerschweer Str.<br>30<br>26123 Oldenburg | Ethics Committee of Physician Chamber Niedersachsen<br>Berliner Allee 20<br>30175 Hannover                                                                              | Grae/097/2016 (approved on May 25, 2016)                                                                                                                                                                                                     |

|    |                                              |                                                                                                                         |                                                                                                                                                                                       |                                                                                                                                                                                                                                                                 |
|----|----------------------------------------------|-------------------------------------------------------------------------------------------------------------------------|---------------------------------------------------------------------------------------------------------------------------------------------------------------------------------------|-----------------------------------------------------------------------------------------------------------------------------------------------------------------------------------------------------------------------------------------------------------------|
| 7  | Office-Based<br>Clinic (Private<br>Practice) | Gastro-Practice Wiesbaden<br><br>Langenbeckplatz 2<br>65189 Wiesbaden                                                   | Ethics Committee of state physician<br>chamber Hessen<br><br>Im Vogelsgesang 3<br>60488 Frankfurt                                                                                     | III/1/ewa MC 106/2016 (approved on June 09, 2016)                                                                                                                                                                                                               |
| 8  | Office-Based<br>Clinic (Private<br>Practice) | Practice Dr. med. B.<br>Buendgens<br><br>Marienstrasse 47-51<br>52249 Eschweiler                                        | Ethics Committee of Physician Chamber<br>Nordrhein<br><br>Tersteegenstrasse 9<br>40474 Duesseldorf                                                                                    | 2016098 (approved on May 23, 2016)                                                                                                                                                                                                                              |
| 9  | Office-Based<br>Clinic (Private<br>Practice) | MVZ Dachau<br>Center for Internal Medicine<br>and for General Medicine<br><br>Muenchner Str. 64<br>85221 Dachau         | Ethics Committee of Bavarian State<br>Physician Chamber<br><br>Mühlbaurstrasse 16<br>81677 Munich                                                                                     | No submission required (according to § 15 of<br>professional code of conduct "Berufsordnung" of<br>state physician chamber Bavaria, no submission of<br>a non-interventional study to local EC is required, if<br>a positive vote from another EC is available) |
| 10 | University<br>Hospital                       | University clinic Muenster<br>Medizinische Klinik B<br><br>Albert-Schweitzer-Campus 1<br>48149 Münster                  | Ethics Committee of physician chamber<br>Westfalen-Lippe and of Medical<br>department of Westfaelische Wilhelms-<br>University Muenster<br><br>Gartenstr. 210 - 214<br>48147 Muenster | 2016-124-f-S (approved on May 24, 2016)                                                                                                                                                                                                                         |
| 11 | University<br>Hospital                       | Clinic of University Munich<br>Medical Clinic II, CED-<br>Ambulance<br><br>Marchioninstr. 15<br>81377 Munich            | Ethics Committee of Medical Department<br>of Ludwig-Maximilians University Munich<br><br>Pettenkoferstr. 8 IV, Zi. I 4.07 — I 4.10<br>80336 Munich                                    | 333-16 (approved on June 06, 2016)                                                                                                                                                                                                                              |
| 12 | Office-Based<br>Clinic (Private<br>Practice) | Gastro Campus Research<br>gBR An der Germania<br><br>Brauerei 6<br>48159 Muenster                                       | Ethics Committee of physician chamber<br>Westfalen-Lippe and of Medical<br>department of Westfaelische Wilhelms-<br>University Muenster<br><br>Gartenstr. 210 - 214<br>48147 Muenster | 2016-124-f-S (approved on June 06, 2016)                                                                                                                                                                                                                        |
| 13 | Research Unit                                | Hamburgisches<br>Forschungsinstitut fuer CED<br>HaFCED e.K. second floor<br><br>Christoph-Probst-Weg 4<br>20251 Hamburg | Ethics Committee of Physician Chamber<br>Hamburg<br><br>Weidestraße 122 b<br>22083 Hamburg                                                                                            | MC-176/16 (approved on June 22, 2016)                                                                                                                                                                                                                           |

|    |                     |                                                                                                                                                           |                                                                                                                                                                           |                                                                                                                                                                                                                                                           |
|----|---------------------|-----------------------------------------------------------------------------------------------------------------------------------------------------------|---------------------------------------------------------------------------------------------------------------------------------------------------------------------------|-----------------------------------------------------------------------------------------------------------------------------------------------------------------------------------------------------------------------------------------------------------|
| 14 | University Hospital | University Clinic Magdeburg<br>A.oe.R.<br>Clinic for Gastroenterology,<br>Hepatology and Infectology<br><br>Leipziger Str. 44<br>39120 Magdeburg          | Ethics Committee of Otto-von-Guericke-<br>University at Medical Department and at<br>University Clinic Magdeburg A. oe. R.<br><br>Leipziger Strasse 44<br>39120 Magdeburg | 75/16 (approved on June 06, 2016)                                                                                                                                                                                                                         |
| 15 | University Hospital | Charite University Medicine<br>Berlin<br>Medical Clinic with focus on<br>Gastroenterology and<br>Hepatology<br><br>Augustenburger Platz 1<br>13353 Berlin | Ethics Committee of Medical Department<br>of Charité University Medicine Berlin<br><br>Charitéplatz 1<br>10117 Berlin                                                     | No submission required (according to § 15 of<br>professional code of conduct "Berufsordnung" of<br>physician chamber Berlin, no submission of a non-<br>interventional study to local EC is required, if a<br>positive vote from another EC is available) |
